# Supplementary material
Source: Springer Nature journal article supplement (https://www.springermedizin.de/resource/supplementary/13054_2011_9752_MOESM1_ESM.pdf/9706616)
Supplement: MOESM1 [file 9706616]

18 Patients Enrolled in  
Parent Trial

4 excluded:

- 1 expired prior to 72hrs
- 3 no 72hr blood available

14 patients with complete  
data

0hr

72hr

14 samples

14 samples

Total: 28 samples for  
analysis
